# Supplementary material
Source: MDPI journal article supplement (https://www.mdpi.com/1996-1073/16/6/2723)
Supplement: s1 [file s1]

# Production of Sustainable Aviation Fuels from Lignocellulosic Residues in Brazil through Hydrothermal Liquefaction: Techno-Economic and Environmental Assessments

Raquel de Souza Deuber <sup>1,2,\*</sup>, J  ssica Marcon Bressanin <sup>1,3</sup>, Daniel Santos Fernandes <sup>4</sup>, Henrique Real Guimar  es <sup>1,2</sup>, Mateus Ferreira Chagas <sup>2,4</sup>, Antonio Bonomi <sup>2,4</sup>, Leonardo Vasconcelos Fregolente <sup>4</sup> and Marcos Djun Barbosa Watanabe <sup>1,5</sup>

<sup>1</sup> School of Food Engineering (FEA), University of Campinas (UNICAMP), Campinas 13083-862, SP, Brazil  
<sup>2</sup> Brazilian Biorenewables National Laboratory (LNBR), Brazilian Center for Research in Energy and Materials (CNPEM), Campinas 13083-970, SP, Brazil  
<sup>3</sup> Fuel Laboratory, Petroleum and Energy Research Institute (LITPEG), Federal University of Pernambuco (UFPE), Recife 50740-550, PE, Brazil  
<sup>4</sup> School of Chemical Engineering (FEQ), University of Campinas (UNICAMP), Campinas 13083-852, SP, Brazil  
<sup>5</sup> Industrial Ecology Programme, Department of Energy and Process Engineering, Norwegian University of Science and Technology, 7034 Trondheim, Norway  
\* Correspondence: r211589@dac.unicamp.br

## Supplementary Material

### 1. Biomass Characterization

Table S1. Biomass characterization

| Composition (weight %, dry basis)  | Sugarcane Bagasse <sup>a</sup> | Sugarcane Straw <sup>b</sup> |
|------------------------------------|--------------------------------|------------------------------|
| Carbon                             | 46 <sup>c</sup>                | 45.6 <sup>c</sup>            |
| Oxygen                             | 44.5 <sup>c</sup>              | 43.9 <sup>c</sup>            |
| Hydrogen                           | 5.8 <sup>c</sup>               | 5.7 <sup>c</sup>             |
| Nitrogen <sup>d</sup>              | 0.6 <sup>d</sup>               | 0.5 <sup>d</sup>             |
| Sulphur <sup>d</sup>               | 0.1 <sup>d</sup>               | 0.1 <sup>d</sup>             |
| Chlorine                           | 0.02 <sup>d</sup>              | 0.1 <sup>d</sup>             |
| Ash                                | 2.9 <sup>c</sup>               | 4.1 <sup>c</sup>             |
| Moisture                           | 50 <sup>c</sup>                | 15 <sup>c</sup>              |
| HHV, MJ/kg, dry basis              | 18.3                           | 18                           |
| LHV, MJ/kg, dry basis              | 16.8                           | 16.7                         |
| LHV, MJ/kg, dry and ash free basis | 17.4                           | 17.3                         |

- a. Including mineral and vegetal impurities.
- b. Composition for baled straw.
- c. Carbon, oxygen, hydrogen, ash and moisture content of bagasse and straw and the were calculated from the Virtual Biorefinery database [1].
- d. Data from [2].

## **2. Heat and power parameters for HTL plant**

The heat and power data necessary for the HTL plant was obtained from a previous study issued by the laboratories of the Department of Energy of the United States. This data is showed in Table S2. Tews et al. has reported the techno-economic analysis of woody conversion into HTL biofuels, providing a complete data set on the mass and energy balances generated from Aspen simulation models. Thus, this available data was used for the calculation of sugarcane HTL, and small adjustments were made, when necessary, as detailed in the Table S2. The specific data concerning the yields obtained from sugarcane bagasse was retrieved from an experimental study which investigated the conversion of this biomass utilizing two different solvents: water and ethanol [3]. As sugarcane bagasse and straw have very similar composition, and there is no experimental study of HTL of sugarcane straw in the literature, the available date on HTL for sugarcane bagasse was used as a proxy for sugarcane straw. Similarly to [4], the present study has assumed that the off-gases (except CH<sub>4</sub>) and bio-char produced as HTL by-products were burned to provide heat to the process. The methane in the off gases

was employed as input for the hydrogen plant, but as it amounted to small volumes, additional natural gas was externally purchased. The mass and energy balances for a methane steam reforming hydrogen plant was retrieved from [5]. The hydrotreating of the HTL bio-crude was assumed to be comprised of two stages: the first stage had a mild severity targeting the stabilization of the bio-crude and the second with higher severity to promote mainly the deoxygenation of the bio-crude.

**Table S2.** Heat and power factors for the calculation of mass and energy balances of HTL

| Section                               | Unit          | EtOH<br>Value | H2O<br>Value | Reference |
|---------------------------------------|---------------|---------------|--------------|-----------|
| <b>BIOMASS PREPROCESSING</b>          |               |               |              |           |
| Grinding energy                       | kWh/kg dry B  | 0.0712        | 0.0712       | [4]       |
| Handling, dust collection             | kWh/kg dry B  | 0.005         | 0.005        | [4]       |
| <b>PUMPING</b>                        |               |               |              |           |
| Inlet pressure                        | bar           | 1             | 1            | Assumed   |
| Outlet pressure                       | bar           | 165           | 165          | [6]       |
| Solid/Solvent Ratio                   | wt.           | 0.2           | 0.2          | Assumed   |
| Electricity consumption               | kWh/kg dry B  | 0.0462        | 0.0462       | [4]       |
| <b>CONVERSION &amp; HEAT RECOVERY</b> |               |               |              |           |
| Inlet temperature                     | °C            | 300           | 300          | [3]       |
| Electricity consumption               | kWh/kg slurry | 0.0089        | 0.0089       | [4]       |
| Yield (of dry biomass)                |               |               |              |           |
| <i>Biocrude</i>                       | wt.           | 0.483         | 0.409        | [3]       |
| <i>Solids</i>                         | wt.           | 0.258         | 0.292        | [3]       |
| <i>Gas</i>                            | wt.           | 0.193         | 0.040        | [3]       |
| <i>Aqueous</i>                        | wt.           | 0.067         | 0.259        | [3]       |
| Biocrude                              |               |               |              |           |
| <i>Moisture</i>                       | wt.           | 0.05          | 0.05         | [4]       |
| <i>Organics</i>                       | wt.           | 0.95          | 0.95         | [4]       |
| Off-gases                             |               |               |              |           |
| CO <sub>2</sub>                       | wt.           | 0.902         | 0.902        | [4]       |
| H <sub>2</sub>                        | wt.           | 0.009         | 0.009        | [4]       |
| C <sub>2</sub> H <sub>6</sub>         | wt.           | 0.025         | 0.025        | [4]       |
| C <sub>3</sub> H <sub>8</sub>         | wt.           | 0.019         | 0.019        | [4]       |

|                                                       |              |             |             |                     |
|-------------------------------------------------------|--------------|-------------|-------------|---------------------|
| <i>C4H10</i>                                          | wt.          | 0.015       | 0.015       | [4]                 |
| <i>CH4</i>                                            | wt.          | 0.03        | 0.03        | [4]                 |
| Heat exchange efficiency                              | %            | 80          | 80          | Assumed             |
| Heat consumption (to heat the inlet stream)           | MJ/kg inlet  | 0.73        | 1.08        | Calculated          |
| Heat consumption (to keep reactor isothermal)         | MJ/kg inlet  | 0.124       | 0.124       | [7]                 |
| Water heat capacity                                   | MJ/kg        | -           | 0.00418     | (NIST Webbook,2021) |
| Bagasse heat capacity                                 | MJ/kg        | 0.00297     | 0.00297     | [8]                 |
| Ethanol heat capacity                                 | MJ/kg        | 0.00257     | -           | (NIST Webbook,2021) |
| <b>SOLVENT RECOVERY</b>                               |              |             |             |                     |
| Heat consumption (steam to evaporate solvent)         | MJ/kg inlet  | 0.11        | -           | Calculated          |
| Ethanol recovery efficiency                           | %            | 90          | -           | Assumed             |
| <b>HYDROTREATMENT AND DISTILLATION</b>                |              |             |             |                     |
| Hydrotreater                                          |              |             |             |                     |
| Inlet temperature                                     | °C           | 165         | 165         | [4]                 |
| Inlet pressure                                        | bar          | 136         | 136         | [4]                 |
| Conversion temperature                                | °C           | 400         | 400         | [4]                 |
| H2/biocrude ratio                                     | kg H2/kg BCO | 0.035       | 0.035       | [4]                 |
| Number of stages                                      | -            | 2           | 2           | [9]                 |
| LHSV 1st stage fixed bed reactor                      | v/v/h        | 0.54        | 0.54        | [9]                 |
| LHSV 2nd stage fixed bed reactor                      | v/v/h        | 0.18        | 0.18        | [9]                 |
| Catalyst type                                         | -            | Co-Mo/Al2O3 | Co-Mo/Al2O3 | [10]                |
| Catalyst density                                      | kg/m3        | 1201        | 1201        | [11]                |
| Catalyst lifetime                                     | y            | 1           | 1           | [4]                 |
| Electricity consumption                               | kWh/kg BCO   | 0.069       | 0.069       | [4]                 |
| Heat consumption (steam for the distillation columns) | MJ/kg        | 0.353       | 0.353       | [4]                 |
| Yield (of bio-crude oil, in natura)                   |              |             |             |                     |
| <i>Hydrotreated oil</i>                               | wt.          | 0.75        | 0.66        | [4]                 |
| <i>Water</i>                                          | wt.          | 0.18        | 0.27        | [4]                 |
| <i>Off gas</i>                                        | wt.          | 0.07        | 0.07        | [4]                 |

|                                                  |                |        |        |                          |
|--------------------------------------------------|----------------|--------|--------|--------------------------|
| Hydrotreated oil to final products               |                |        |        |                          |
| <i>Gasoline</i>                                  | wt.            | 0.3    | 0.3    | [6]                      |
| <i>Diesel</i>                                    | wt.            | 0.15   | 0.15   | [6]                      |
| <i>Jet fuel</i>                                  | wt.            | 0.5    | 0.5    | [6]                      |
| <i>Marine</i>                                    | wt.            | 0.05   | 0.05   | [6]                      |
| Off gases                                        |                |        |        |                          |
| <i>H2</i>                                        | wt.            | 0.078  | 0.078  | [4]                      |
| <i>C2H6</i>                                      | wt.            | 0.151  | 0.151  | [4]                      |
| <i>C3H8</i>                                      | wt.            | 0.132  | 0.132  | [4]                      |
| <i>C4H10</i>                                     | wt.            | 0.049  | 0.049  | [4]                      |
| <i>C5H12</i>                                     | wt.            | 0.015  | 0.015  | [4]                      |
| <i>C6H14</i>                                     | wt.            | 0.393  | 0.393  | [4]                      |
| <i>CH4</i>                                       | wt.            | 0.182  | 0.182  | [4]                      |
| <b>HYDROGEN PRODUCTION</b>                       |                |        |        |                          |
| Natural gas feedstock (@94.5% mol CH4)           | kg NG/kg H2    | 3.12   | 3.12   | [12]                     |
| Fuel (to fire the reformer, @94.5% mol CH4)      | kgNG/kgH2      | 0.34   | 0.34   | [12]                     |
| Steam requirement @2.6MPa/380 psi                | kg steam/kg H2 | 10.29  | 10.29  | [12]                     |
| Steam production (excess) @4.8MPa/700psi         | kg steam/kg H2 | 14.78  | 14.78  | [12]                     |
| Electricity consumption                          | kWh/ kgH2      | 0.42   | 0.42   | [13]                     |
| GHSV                                             | h-1            | 4000   | 4000   | [4]                      |
| Catalyst type                                    | -              | NiMo   | NiMo   | [12]                     |
| Catalyst density                                 | kg/m3          | 1201   | 1201   | [11]                     |
| Catalyst lifetime                                | y              | 3      | 3      | [4]                      |
| Hydrogen purity                                  | mol% H2        | >99.95 | >99.95 | [12]                     |
| <b>UTILITIES</b>                                 |                |        |        |                          |
| Boiler efficiency (gas)                          | %              | 75     | 75     | Industrial communication |
| Boiler efficiency (char)                         | %              | 50     | 50     | Industrial communication |
| Fired Heater efficiency (gas, indirect heating)  | %              | 75     | 75     | Industrial communication |
| Fired Heater efficiency (char, indirect heating) | %              | 50     | 50     | Industrial communication |

|                               |             |      |      |      |
|-------------------------------|-------------|------|------|------|
| Air excess (combustion)       | %           | 20   | 20   | [11] |
| Off-gases lower heating value | MJ/kg       | 41.1 | 41.3 | [3]  |
| Bio-char lower heating value  | MJ/kg       | 15.4 | 16.7 | [3]  |
| Cooling water makeup          | L/L product | 9.44 | 9.44 | [9]  |
| Boiler feed water makeup      | L/L product | 0.96 | 0.96 | [9]  |

Abbreviations: B= Biomass, BCO= biocrude oil

### 3. Mass fluxograms of the evaluated scenarios

The mass flows for each of the evaluated scenarios are showed in Figure S3-S7. The processes in the fluxogram with brow border are related to 2G (HTL) and the processes with green border are related to 1G (ethanol distillery). 1G process operates during sugarcane season (200 days), and the 2G operates for 330 days. Therefore, a storage of sugarcane bagasse was considered to allow the round year operation of HTL process. A storage of ethanol was also considered within the scenarios that utilize ethanol as solvent for liquefaction.

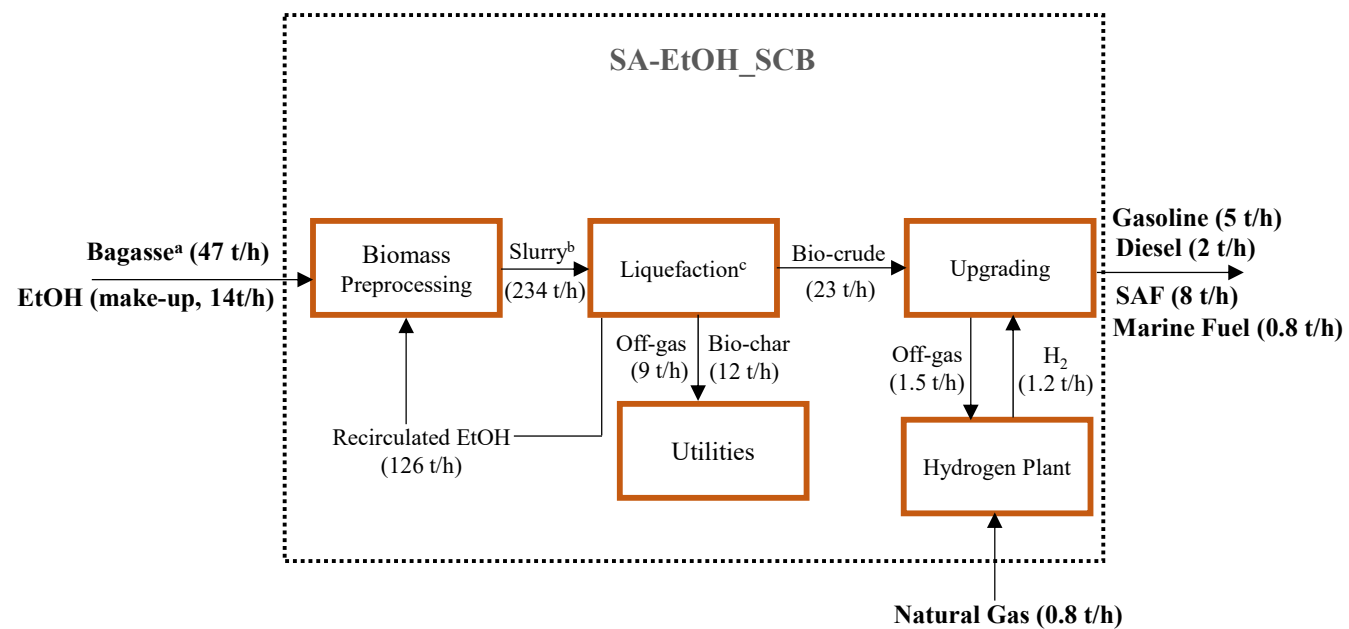

**Figure S1.** Mass fluxogram of SA-EtOH\_SCB

a: Bagasse mass given in dry basis.

b: The bagasse moisture was accounted for in the slurry.

c: Liquefaction and Products Separation.



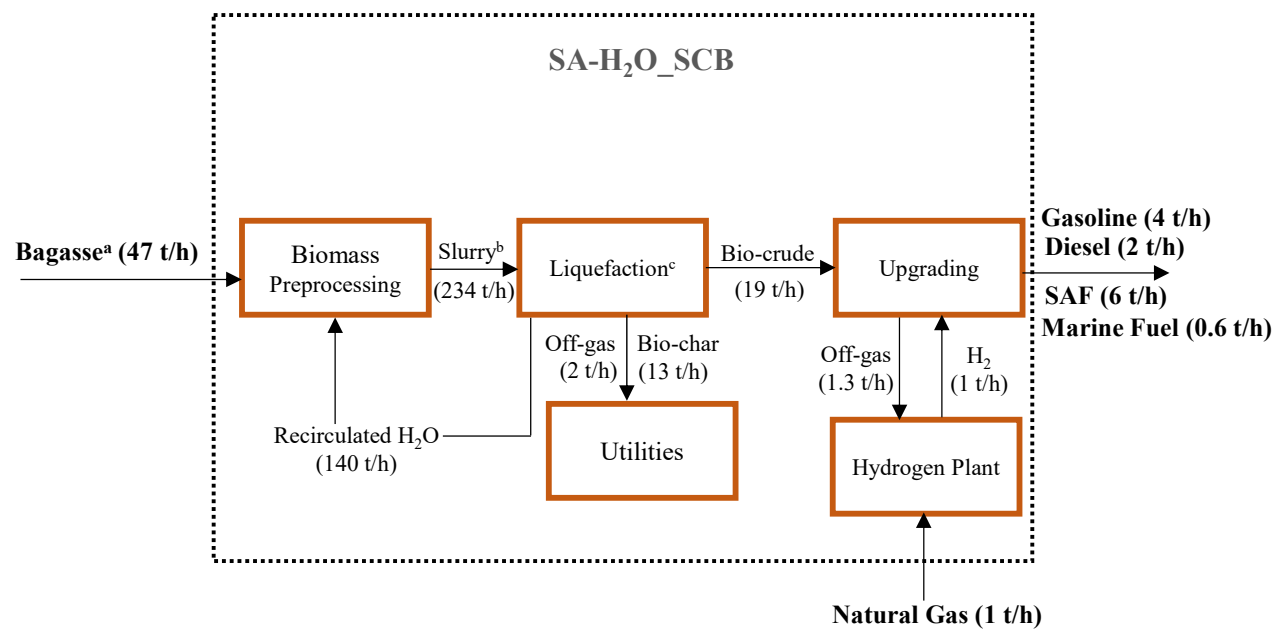

**Figure S2.** Mass fluxogram of SA-H<sub>2</sub>O\_SCB

a: Bagasse mass given in dry basis.

b: The bagasse moisture was accounted in the slurry.

c: Liquefaction and Products Separation.

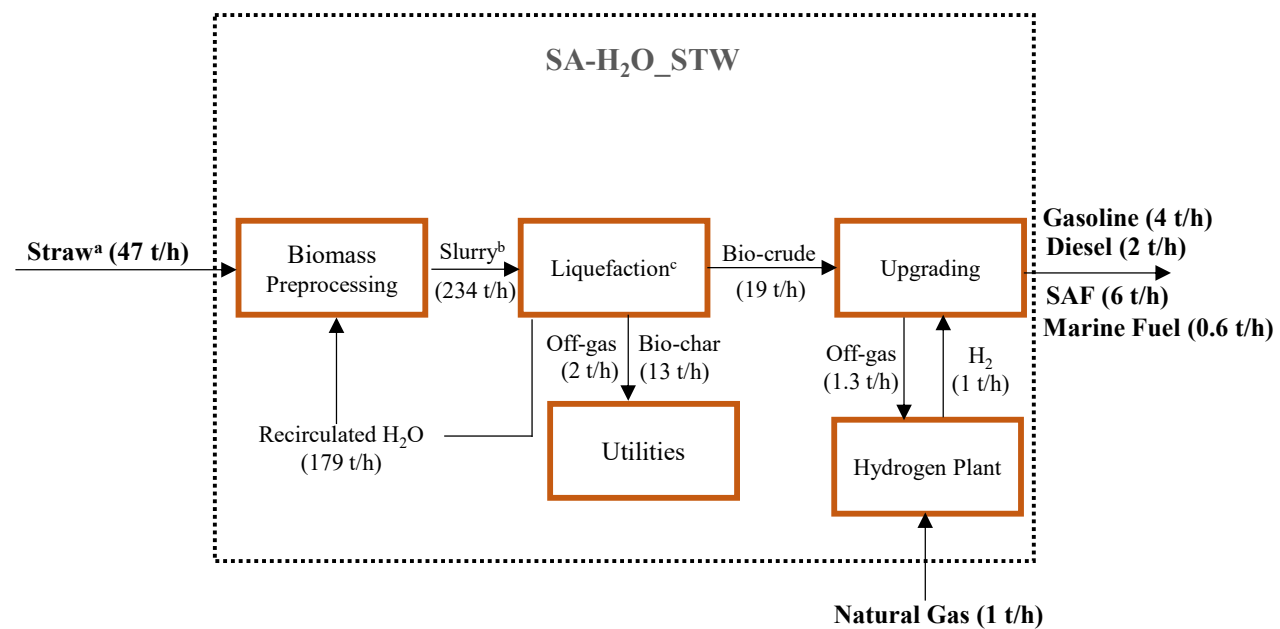

**Figure S3.** Mass fluxogram of SA-H<sub>2</sub>O\_STW

a: Straw mass given in dry basis.

b: The straw moisture was accounted for in the slurry.

c: Liquefaction and Products Separation.



e. Ethanol Storage.

f. Vinasse Biodigestion & Biomethane Upgrading

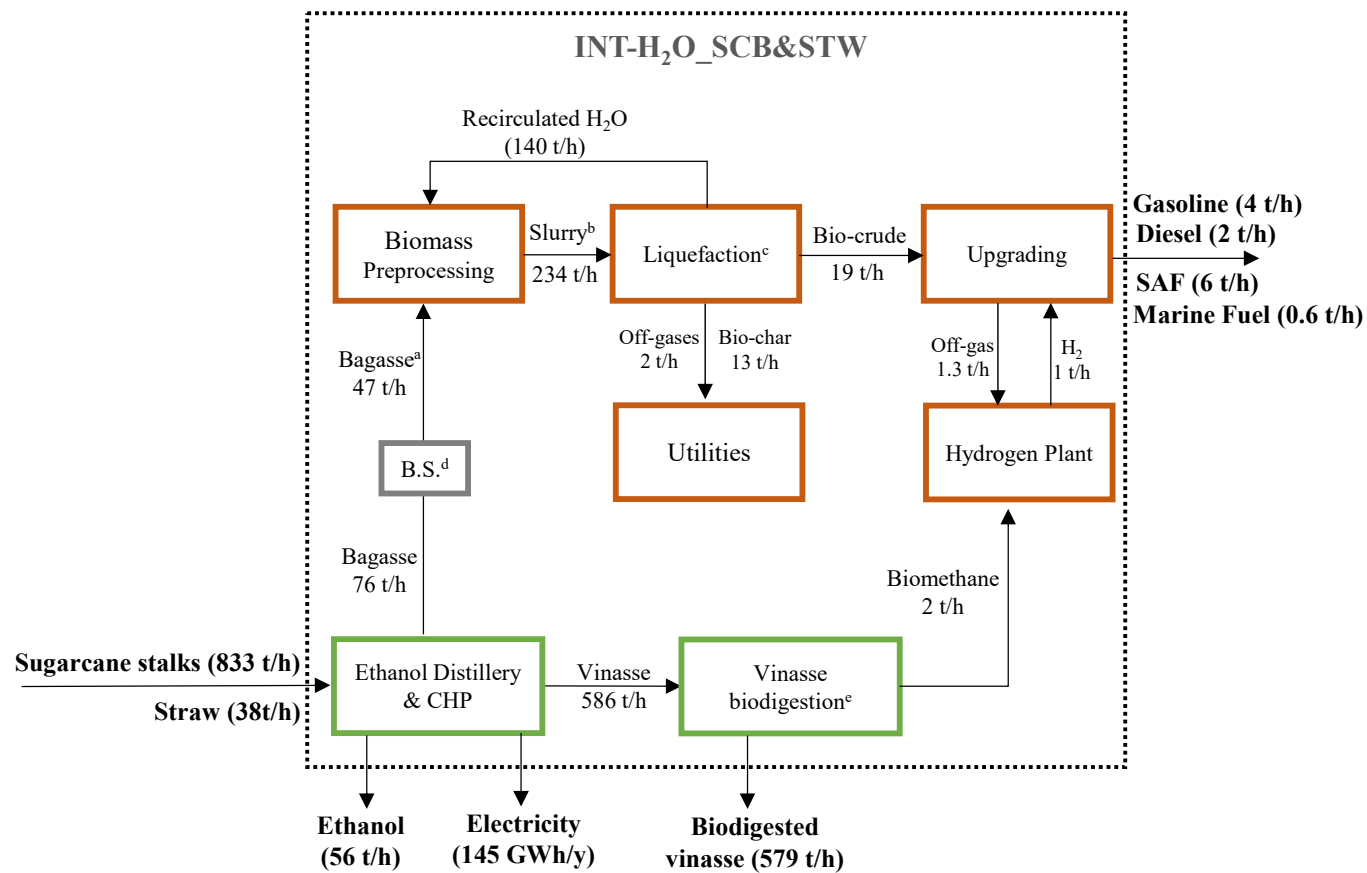

Figure S5. Mass fluxogram of INT-H<sub>2</sub>O\_SCB&STW

a: Bagasse mass given in dry basis.

b: The bagasse moisture was accounted for in the slurry.

c: Liquefaction and Products Separation.

d. Bagasse Storage.

e. Vinasse Biodigestion & Biomethane Upgrading

#### 4. Techno-economic analysis

The Equation (S1) was used to scale and update the capital costs from the reference study [4].

$$CapEx_{2019}(US\$) = CapEx_{2007}(US\$)^{0.7} \cdot (Location Factor) \cdot \left( \frac{CEPCI_{2019}}{CEPCI_{2007}} \right) \quad \text{Equation (S1)}$$

In order to calculate the production cost of the standard aviation fuel and the other products obtained in the biorefineries (both in stand-alone and integrated configurations) a cost allocation approach was adopted from the Virtual Biorefinery framework and from other studies [1,14,15]. This cost allocation considered the share of each product on total revenue among the biorefinery products. Thus, all the operating and capital expenses were allocated according to the standard aviation fuel share on total revenues. For instance, if 40 % of the revenue comes from SAF,

this proportion of 40% was maintained to allocate the expenses associated with sugarcane, bagasse, straw, chemical inputs, maintenance, wages, capital costs, and so on, to SAF.

Table S3. CAPEX of the stand-alone scenarios

| Area Description, MUS\$                   | SA-<br>EtOH_SCB | SA-<br>H <sub>2</sub> O_SCB | SA-<br>H <sub>2</sub> O_STW |
|-------------------------------------------|-----------------|-----------------------------|-----------------------------|
| Area 1-Biomass Preprocessing              | 18              | 18                          | 12                          |
| Area 2-Liquefaction/Product Recovery      | 65              | 65                          | 65                          |
| Area 3-Hydrotreating                      | 28              | 25                          | 25                          |
| Area 4-Hydrogen Generation                | 17              | 17                          | 17                          |
| Area 5- Utilities & Waste Water Treatment | 18              | 15                          | 15                          |
| Total Installed Cost, TIC                 | 146             | 139                         | 134                         |
| Total Direct Costs, TDC (14,5% of TIC)    | 21              | 20                          | 19                          |
| Indirect costs (55% of TDC)               | 92              | 88                          | 84                          |
| <b>Fixed Capital Investment, FCI</b>      | <b>259</b>      | <b>247</b>                  | <b>237</b>                  |
| Working capital (10% of FCI)              | 26              | 25                          | 24                          |
| <b>Total capital investment</b>           | <b>285</b>      | <b>272</b>                  | <b>261</b>                  |

Table S4. HTL CAPEX of the integrated scenarios

| Area Description                        | Scenario         |                              |
|-----------------------------------------|------------------|------------------------------|
| ETHANOL DISTILLERY, MUS\$               | INT-EtOH_SCB&STW | INT-H <sub>2</sub> O_SCB&STW |
| Area 1- Sugarcane & Straw Preprocessing | 15               | 15                           |
| Area 2-Juice Extraction                 | 25               | 25                           |

|                                         |            |            |
|-----------------------------------------|------------|------------|
| Area 3-Juice Treatment                  | 17         | 17         |
| Area 4- Juice Fermentation              | 17         | 17         |
| Area 5- Ethanol Distillation            | 48         | 48         |
| Area 6- Steam System & Power Generation | 124        | 124        |
| Area 7- Vinasse Biodigestion            | 41         | 41         |
| Buildings, Auxiliaries                  | 38         | 37         |
| <b>Fixed Capital Investment, 1G</b>     | <b>325</b> | <b>324</b> |
| <hr/>                                   |            |            |
| <b>HTL, MUS\$</b>                       |            |            |
| Area 8-Feedstock Handling               | 18         | 18         |
| Area 9-Liquefaction/Product Recovery    | 65         | 65         |
| Area 10-Hydrotreating                   | 28         | 25         |
| Area 11-Hydrogen Generation             | 18         | 15         |
| Total Installed Cost, TIC               | 129        | 123        |
| Total Direct Costs, TDC (14,5% of TIC)  | 19         | 18         |
| Indirect costs (55% of TDC)             | 81         | 77         |
| <b>Fixed Capital Investment, 2G</b>     | <b>229</b> | <b>218</b> |
| <hr/>                                   |            |            |
| Total Fixed Capital Investment, FCI     | 554        | 542        |
| Working capital (10% of FCI)            | 55         | 54         |
| <b>Total capital investment</b>         | <b>609</b> | <b>596</b> |
| <hr/>                                   |            |            |

5. Life cycle assessment

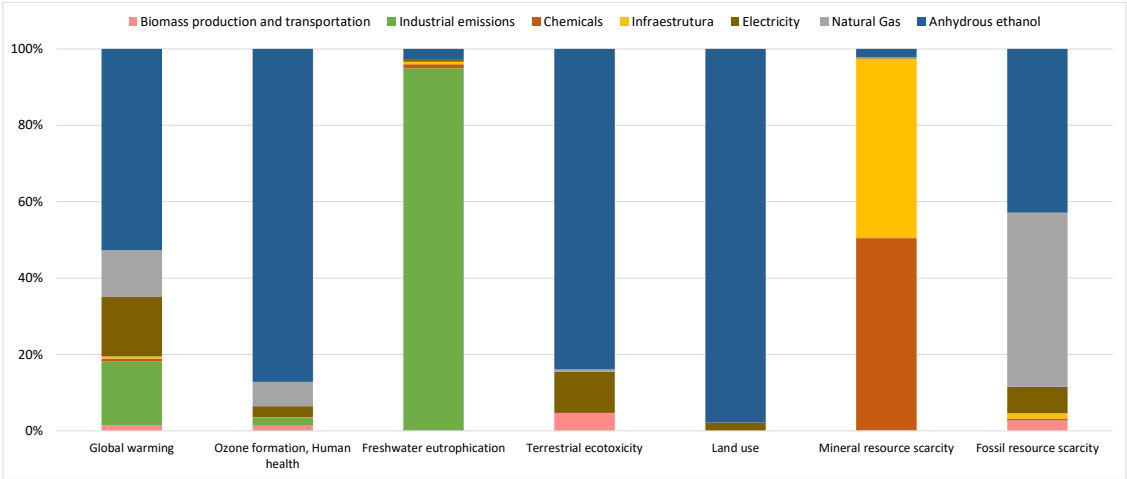

Figure S6. Environmental impact breakdown for the selected categories of SA-EtOH\_SCB

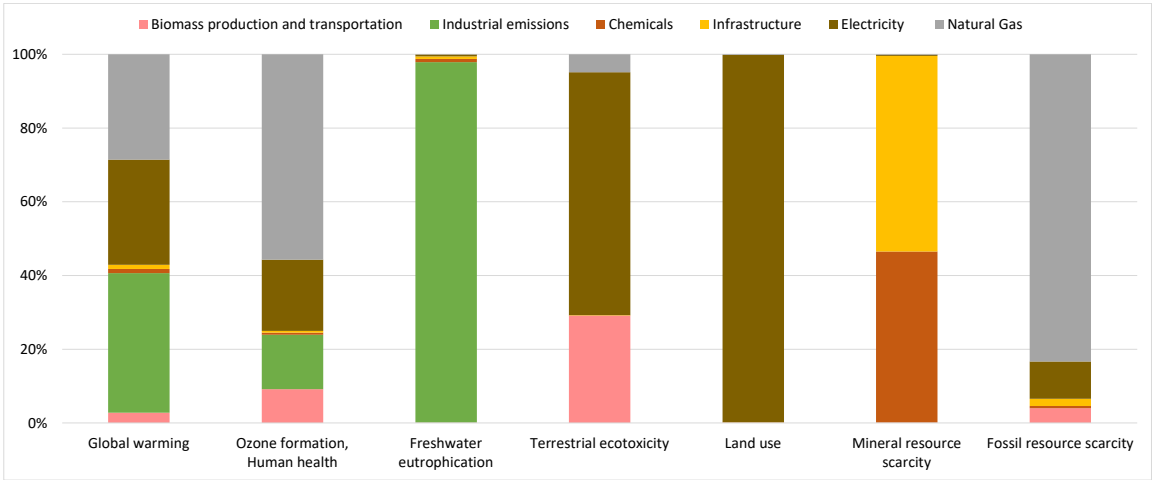

Figure S7. Environmental impact breakdown for the selected categories of SA-H<sub>2</sub>O\_SCB



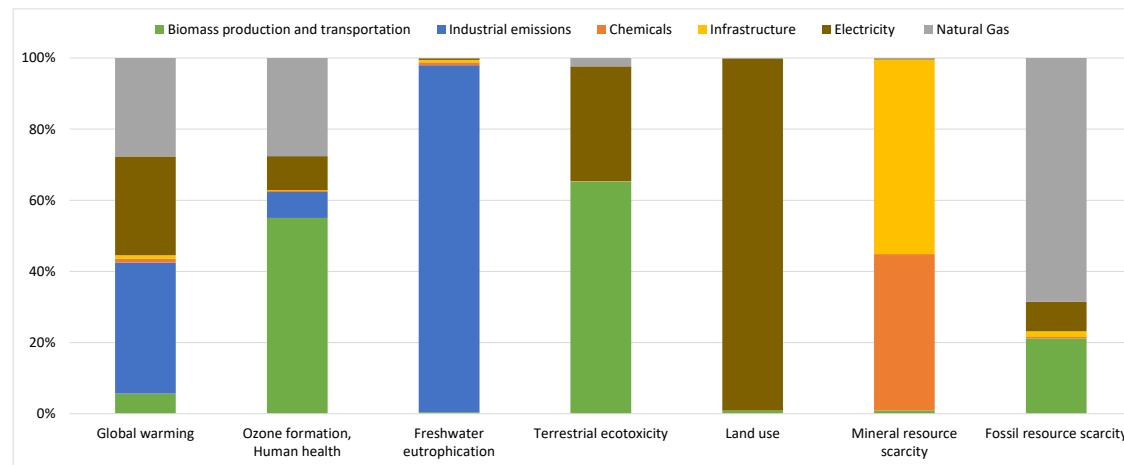

**Figure S8.** Environmental impact breakdown for the selected categories of SA-H<sub>2</sub>O\_SCB

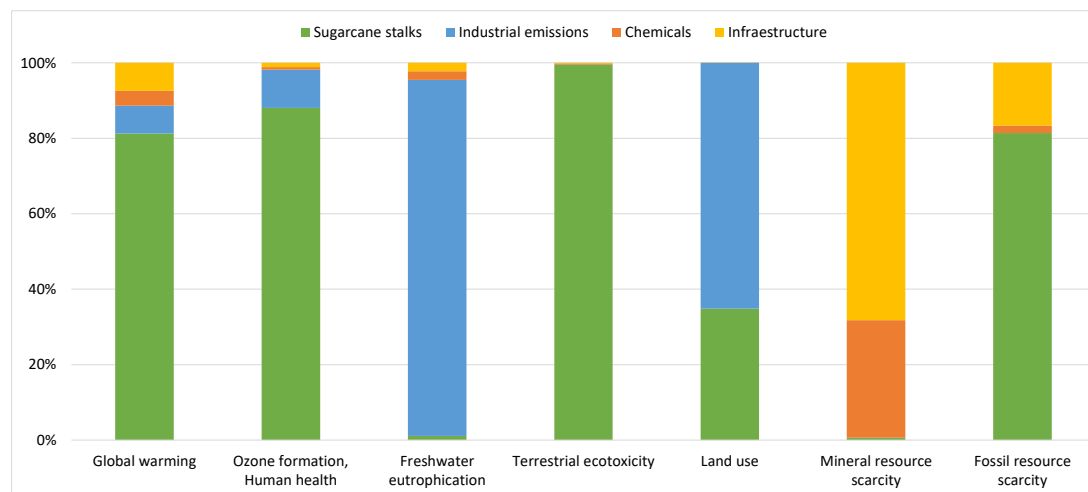

**Figure S9.** Environmental impact breakdown for the selected categories of INT-EtOH\_SCB&STW

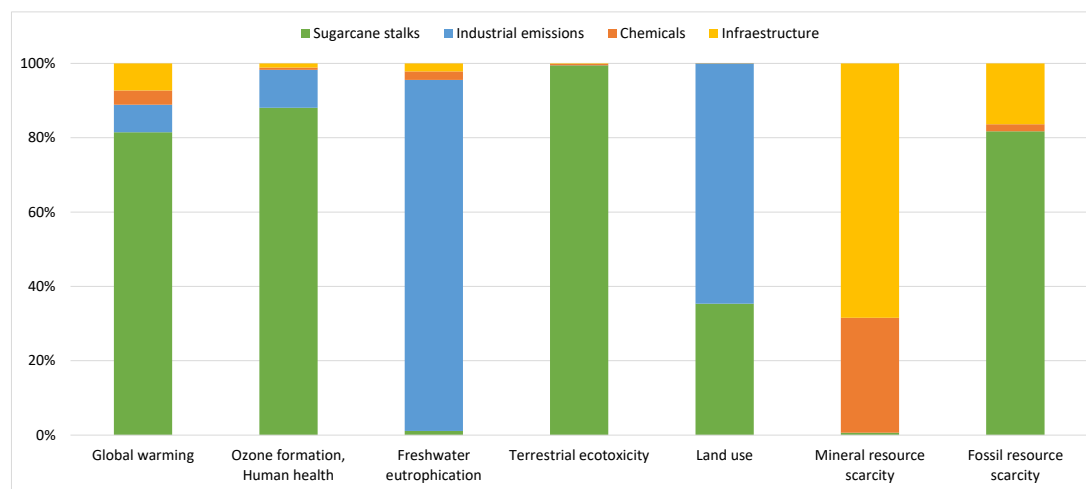

**Figure S10.** Environmental impact breakdown for the selected categories of INT-H<sub>2</sub>O\_SCB&STW

**Table S5.** Life Cycle Inventory of the evaluated scenarios

| Flows                                                             | Unit/<br>year  | SA-EtOH<br>_SCB | SA-H2O<br>_SCB | SA-H2O<br>_STW | INT-EtOH_<br>SCB&STW | INT-H2O_<br>SCB&STW |
|-------------------------------------------------------------------|----------------|-----------------|----------------|----------------|----------------------|---------------------|
| <b>Inputs</b>                                                     |                |                 |                |                |                      |                     |
| <b>Natural resources</b>                                          |                |                 |                |                |                      |                     |
| Air                                                               | t              | 1,223,730       | 1,186,192      | 1,186,192      | 2,659,262            | 2,659,262           |
| Occupation, industrial area, built up                             | m2a            | 0.0042          | 0.0040         | 0.0039         | 0.03                 | 0.03                |
| Transformation, from agriculture                                  | m2             | 0.0001          | 0.0001         | 0.0001         | 0.001                | 0.001               |
| Transformation, to industrial area, built up                      | m2             | 0.0001          | 0.0001         | 0.0001         | 0.001                | 0.001               |
| <b>Materials/fuels</b>                                            |                |                 |                |                |                      |                     |
| Sugarcane                                                         | t              | -               | -              | -              | 4,000,000            | 4,000,000           |
| Sugarcane straw (wet)                                             | t              | -               | -              | 436,553        | 183,400              | 183,400             |
| Bagasse (wet)                                                     | t              | 742,140         | 742,140        | -              | -                    | -                   |
| Quicklime, milled, packed, at plant/CH U                          | t              | -               | -              | -              | 2,550                | 2,550               |
| Sulphuric acid, liquid, at plant, market mix/CTBE BR U            | t              | -               | -              | -              | 1,696                | 1,696               |
| Phosphoric acid, industrial grade, 85% in H2O, at plant/RER U     | t              | -               | -              | -              | 875                  | 875                 |
| Chemicals inorganic, at plant/GLO U                               | t              | -               | -              | -              | 11                   | 11                  |
| Chemicals inorganic, at plant/GLO U                               | t              | -               | -              | -              | 4                    | 4                   |
| Zeolite, powder, at plant/RER S                                   | t              | 203             | 172            | 172            | 443                  | 443                 |
| Water treatment biorefinery/CTBE BR U                             | m <sup>3</sup> | 409,122         | 215,167        | 40,459         | 4,410,353            | 4,215,814           |
| Bagasse, to combustion/CTBE BR U                                  | t              | -               | -              | -              | 401,684              | 401,684             |
| Bio-char, to combustion/CTBE BR U                                 |                | 84,679          | 85,878         | 85,878         | -                    | -                   |
| Off-gases, to combustion/CTBE BR U                                | t              | 3,238           | 0              | 0              | 0                    | 0                   |
| Lubricating oil, market mix/CTBE BR U                             | t              | -               | -              | -              | 13                   | 13                  |
| Steel product manufacturing, average metal working/RER U          | t              | 337             | 322            | 309            | 5,379                | 5,268               |
| Chromium steel product manufacturing, average metal working/RER U | t              | 20              | 19             | 18             | 314                  | 307                 |

|                                                                 |     |         |        |        |       |       |
|-----------------------------------------------------------------|-----|---------|--------|--------|-------|-------|
| Concrete, sole plate and foundation, at plant/CH U              | m³  | 458     | 437    | 420    | 7,206 | 7,057 |
| Building, hall, steel construction/CH/I U                       | m2  | 96      | 91     | 88     | 1,507 | 1,476 |
| Electricity, high voltage, at grid/CTBE BR U                    | kwh | 69,175  | 67,202 | 67,202 | -     | -     |
| Natural gas, production BR, at long distance pipeline/CTBE BR U | m³  | 9,217   | 11,331 | 11,331 | 0     | 0     |
| Anhydrous ethanol, Book2015, 1.2.2/CTBE BR U                    | t   | 111,462 | -      | -      | -     | -     |
| Sodium hydroxide, without water, in 50% solution state {GLO}    | t   | -       | -      | -      | 162   | 162   |
| Iron ore, beneficiated, 65% Fe {GLO}   market for   Cut-off, U  | t   | -       | -      | -      | 1.61  | 1.61  |
| Triethylene glycol {RoW}                                        | t   | -       | -      | -      | 0.13  | 0.13  |

### Outputs

#### Main products

|                           |      |        |        |        |         |         |
|---------------------------|------|--------|--------|--------|---------|---------|
| Sustainable aviation fuel | t    | 67,210 | 50,432 | 50,432 | 67,210  | 50,432  |
| Green gasoline            | t    | 40,326 | 30,259 | 30,259 | 40,326  | 30,259  |
| Green diesel              | t    | 20,163 | 15,129 | 15,129 | 20,163  | 15,129  |
| Marine fuel               | t    | 6,721  | 5,043  | 5,043  | 6,721   | 5,043   |
| Anhydrous ethanol         | t    | 0      | 0      | 0      | 159,780 | 271,241 |
| Electricity               | GWh  | 0.00   | 0.00   | 0.00   | 145     | 145     |
| NVG (from biomethane)     | MNm3 | -      | -      | -      | 4       | 2       |
| Sulphur                   | t    | -      | -      | -      | 333     | 333     |

#### Residues sent to the field

|                                           |   |   |   |   |           |           |
|-------------------------------------------|---|---|---|---|-----------|-----------|
| Vinasse (biodigested)                     | t | - | - | - | 2,811,597 | 2,811,597 |
| Filter cake (wet)                         | t | - | - | - | 163,469   | 163,469   |
| Ash (dry)                                 | t | - | - | - | 19,281    | 19,281    |
| Soil (from sugarcane cleaning and boiler) | t | - | - | - | 12,524    | 12,524    |

#### Emissions to air

|                          |   |        |        |        |         |         |
|--------------------------|---|--------|--------|--------|---------|---------|
| Carbon dioxide, biogenic | t | -      | -      | -      | 924,690 | 924,690 |
| Methane, biogenic        | t | -      | -      | -      | 22.01   | 22.01   |
| Carbon dioxide, fossil   | t | 18,206 | 22,382 | 22,382 | -       | -       |
| NMVOC                    | t | 5.72   | 5.51   | 5.51   | -       | -       |
| Methane, fossil          | t | 0.22   | 0.21   | 0.21   | -       | -       |
| Carbon monoxide, fossil  | t | 4.46   | 4.30   | 4.30   | -       | -       |
| Dinitrogen monoxide      | t | 0.14   | 0.13   | 0.13   | -       | -       |

|                                |   |       |       |       |      |      |
|--------------------------------|---|-------|-------|-------|------|------|
| Nitrogen oxides                | t | 11.19 | 10.77 | 10.77 | -    | -    |
| Sox (sulfur dioxide)           | t | 0.06  | 0.05  | 0.05  | 0.01 | 0.01 |
| PM (particulates, unspecified) | t | 1.67  | 1.61  | 1.61  | -    | -    |

1. Bonomi, A.; Cavalett, O.; da Cunha, M.P.; Lima, M.A. *Virtual Biorefinery-An Optimization Strategy for Renewable Carbon Valorization*; 2016; ISBN 978-3-319-26045-7.
2. Hassuani, S.J.; Leal, M.R.L.V.; Macedo, I. de C.; Canavieira, C. de T.; Programme, U.N.D. *Biomass power generation : sugar cane bagasse and trash*; CTC ; PNUD: Piracicaba; Brasília, 2005; ISBN 8599371010 9788599371015.
3. Kosinkova, J.; Ramirez, J.A.; Nguyen, J.; Ristovski, Z.; Brown, R.; Lin, C.S.K.; Rainey, T.J. Hydrothermal Liquefaction of Bagasse Using Ethanol and Black Liquor as Solvents. *Biofuels Bioprod. Biorefining* **2015**, 9, 630–638, doi:10.1002/bbb.1578.
4. Tews, I.J.; Zhu, Y.; Drennan, C.; Elliott, D.C.; Snowden-Swan, L.J.; Onarheim, K.; Solantausta, Y.; Beckman, D. *Biomass Direct Liquefaction Options: TechnoEconomic and Life Cycle Assessment*; Pacific Northwest National Laboratory; Richland, WA, 2014;
5. Spath, P.L.; Mann, M.K. *Life Cycle Assessment of Hydrogen Production via Natural Gas Steam Reforming*; National Renewable Energy Laboratory; Golden, CO, 2001;
6. Ramirez, J.A.; Humphris, A.; Davies, A.; Kosinkova, J.; Brown, J.; Rainey, T.J. Modelling Distillation of Biomass Liquefaction Bio-Crude Using ASPEN. In *Proceedings of the Chemeca Conference*; Paper n. 3405709, 2016; pp. 1–9.
7. Li, S.; Jiang, Y.; Snowden-Swan, L.J.; Askander, J.A.; Schmidt, A.J.; Billing, J.M. Techno-Economic Uncertainty Analysis of Wet Waste-to-Biocrude via Hydrothermal Liquefaction. *Appl. Energy* **2021**, 283, 116340, doi:10.1016/j.apenergy.2020.116340.
8. Cortez, L.; Gómez, E. A METHOD FOR EXERGY ANALYSIS OF SUGARCANE BAGASSE BOILERS. *Braz. J. Chem. Eng.* **1998**, 15, 59–65.
9. Zhu, Y.; Biddy, M.J.; Jones, S.B.; Elliott, D.C.; Schmidt, A.J. Techno-Economic Analysis of Liquid Fuel Production from Woody Biomass via Hydrothermal Liquefaction (HTL) and Upgrading. *Appl. Energy* **2014**, 129, 384–394, doi:10.1016/j.apenergy.2014.03.053.
10. Snowden-Swan, L.; Zhu, Y.; Jones, S.; Elliott, D.; Schmidt, A.; Hallen, R.; Billing, J.; Hart, T.; Fox, S.; Maupin, G. *Hydrothermal Liquefaction and Upgrading of Municipal Wastewater Treatment Plant Sludge: A Preliminary Techno-Economic Analysis*; Pacific Northwest National Laboratory PNNL, 2016; p. PNNL-25464;
11. de Silva, C.C. Techno-Economic and Environmental Analysis of Oil Crop and Forestry Residues Based Integrated Biorefineries in Brazil, 2016.
12. Spath, P.L.; Mann, M.K. *Life Cycle Assessment of Hydrogen Production via Natural Gas Steam Reforming*; National Renewable Energy Laboratory; Golden, CO, 2001; p. 23;.
13. Mahler AGS Hydrogen Generation by Steam Reforming Available online: <https://www.mahler-ags.com/hydrogen/hydroform-c/>.
14. Watanabe, M.D.B.; Pereira, L.G.; Chagas, M.F.; da Cunha, M.P.; Jesus, C.D.F.; Souza, A.; Rivera, E.C.; Maciel Filho, R.; Cavalett, O.; Bonomi, A. *Sustainability Assessment Methodologies*; 2016; ISBN 978-3-319-26045-7.
15. Klein, B.C.; Chagas, M.F.; Junqueira, T.L.; Rezende, M.C.A.F.; Cardoso, T. de F.; Cavalett, O.; Bonomi, A. Techno-Economic and Environmental Assessment of Renewable Jet Fuel Production in Integrated Brazilian Sugarcane Biorefineries. *Appl. Energy* **2018**, 209, 290–305, doi:10.1016/j.apenergy.2017.10.079.
